# Supplementary material
Source: PubMed Central journal article supplement (PMC1564200)

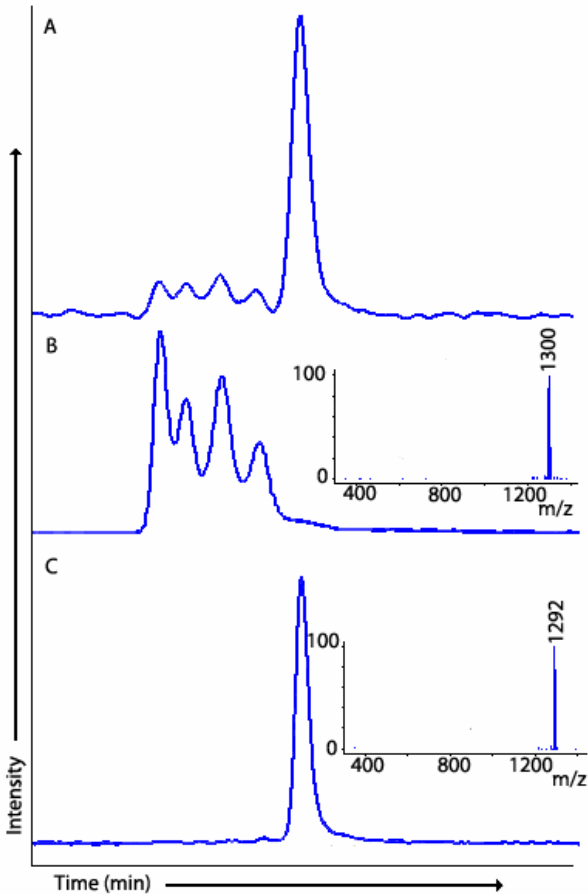

Supplement: pnas_0510157103_1.pdf [file pnas_0510157103_1.pdf]

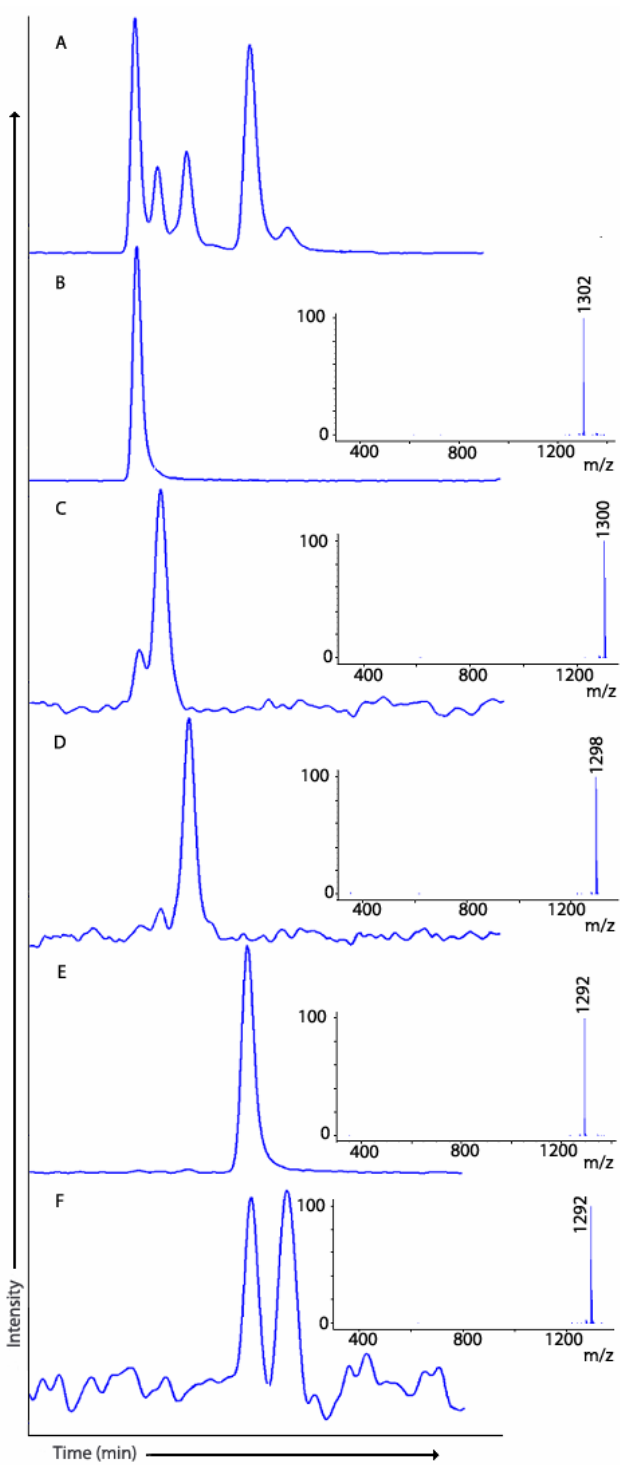

Supplement: pnas_0510157103_2.pdf [file pnas_0510157103_2.pdf]

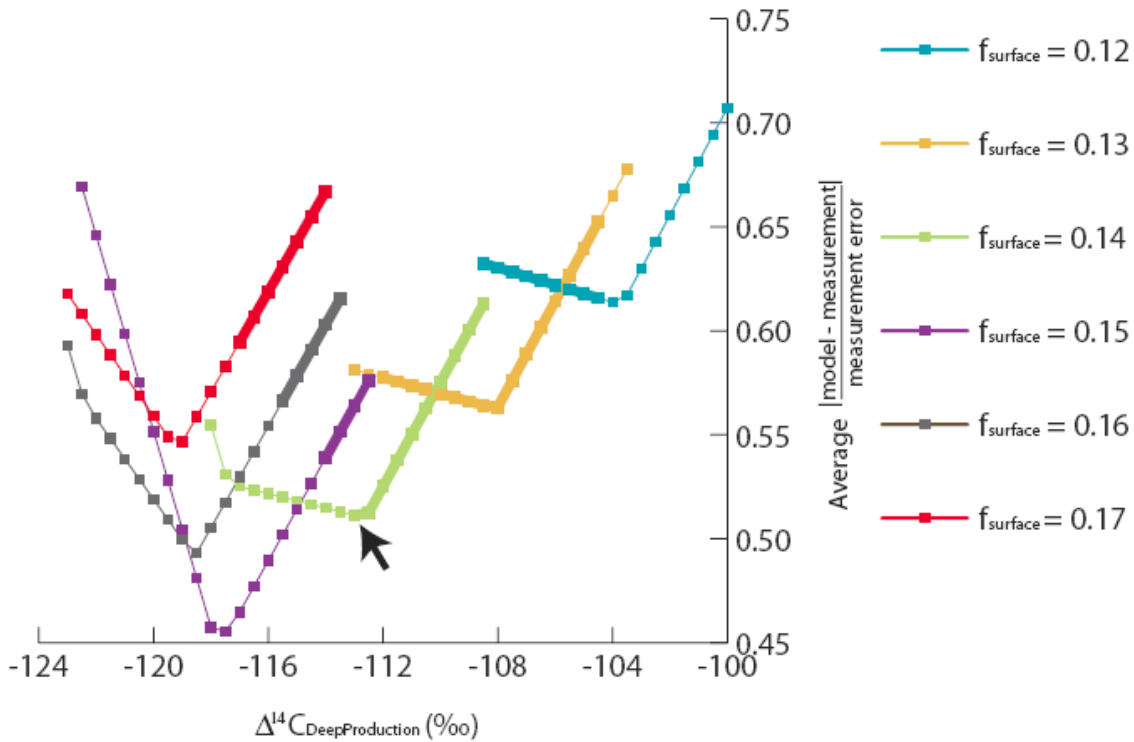

Supplement: pnas_0510157103_3.pdf [file pnas_0510157103_3.pdf]
